# Supplementary material for: Daylight saving time as a potential public health intervention: an observational study of evening daylight and objectively-measured physical activity among 23,000 children from 9 countries
Source: PubMed Central journal article supplement (PMC4364628; doi:10.1186/1479-5868-11-84), 2014-10-23
Supplement: 12966_2014_940_MOESM1_ESM.pdf [file 12966_2014_940_MOESM1_ESM.pdf]

**Additional information on methods****Table A1: ICAD studies: country of origin, design and characteristics of study participants included in the present analyses**

| No. | Full name                                                                                 | Short name       | Country            | Design (waves included)                         | Years       | Mother education available (% with data) | N    | % female | Age     |
|-----|-------------------------------------------------------------------------------------------|------------------|--------------------|-------------------------------------------------|-------------|------------------------------------------|------|----------|---------|
| 1   | Denmark European Youth Heart Study                                                        | Denmark EYHS     | Denmark            | Longitudinal (2 waves)                          | 1997 - 2004 | Yes (94%)                                | 1364 | 56%      | 8 - 16  |
| 2   | Copenhagen School Child Intervention Study                                                | Denmark CSCIS    | Denmark            | Natural experimental                            | 2001 - 2003 | No                                       | 667  | 48%      | 5 - 11  |
| 3   | Estonia European Youth Heart Study                                                        | Estonia EYHS     | Estonia            | Cross-sectional                                 | 1998 - 1999 | Yes (90%)                                | 656  | 55%      | 8 - 16  |
| 4   | Kinder-Sportstudie Study                                                                  | Switzerland KISS | Switzerland        | RCT (baseline only)                             | 2005        | Yes (95%)                                | 404  | 52%      | 6 - 12  |
| 5   | Norway European Youth Heart Study                                                         | Norway EYHS      | Norway             | Cross-sectional                                 | 1999 - 2000 | Yes (93%)                                | 384  | 50%      | 8 - 10  |
| 6   | Avon Longitudinal Study of Parents and Children                                           | ALSPAC           | England            | Longitudinal (2 waves)                          | 2003 - 2007 | Yes (82%)                                | 6593 | 53%      | 10 - 15 |
| 7   | Personal and Environmental Associations with Children's Health                            | PEACH            | England            | Longitudinal (2 waves)                          | 2006 - 2009 | Yes (45%)                                | 1241 | 54%      | 9 - 12  |
| 8   | Sport, Physical activity and Eating behaviour: Environmental Determinants in Young people | SPEEDY           | England            | Cross-sectional                                 | 2007        | No                                       | 1967 | 56%      | 9 - 11  |
| 9   | Children's Health and Activity Monitoring for Schools, UK                                 | CHAMPS UK        | England            | Cross-sectional                                 | 2006 - 2007 | No                                       | 483  | 50%      | 5 - 16  |
| 10  | Children Living in Active Neighbourhoods                                                  | CLAN             | Australia          | Longitudinal (3 waves)                          | 2001 - 2006 | Yes (96%)                                | 1117 | 54%      | 5 - 16  |
| 11  | Healthy Eating and Play Study                                                             | HEAPS            | Australia          | Longitudinal (2 waves)                          | 2002 - 2006 | Yes (97%)                                | 1342 | 53%      | 5 - 15  |
| 12  | Iowa Bone Development Study                                                               | Iowa Bone Study  | USA                | Longitudinal (4 waves)                          | 1998 - 2007 | Yes (84%)                                | 579  | 51%      | 5 - 14  |
| 13  | Project Trial of Activity for Adolescent Girls                                            | Project TAAG     | USA                | RCT (baseline + 2 follow-up waves for controls) | 2002 - 2006 | Yes (74%)                                | 4724 | 100%     | 10 - 16 |
| 14  | Portugal (Madeira) European Youth Heart Study                                             | Madeira EYHS     | Portugal (Madeira) | Longitudinal (2 waves)                          | 1999 - 2008 | Yes (52%)                                | 1214 | 50%      | 8 - 17  |
| 15  | Pelotas 1993 Birth Cohort                                                                 | Pelotas, Brazil  | Brazil             | Cross-sectional                                 | 2006 - 2007 | No                                       | 453  | 47%      | 12 - 14 |

See Sherar *et al.* (2011) for further details about the 15 studies. RCT=randomised controlled trial; only baseline samples used in RCTs except in Project TAAG where follow-up repeat-cross-sectional samples from control schools also included, because in this study it was possible to distinguish intervention and control children.

**Reference:** Sherar LB, Griew P, Esliger DW, *et al.* International children's accelerometry database (ICAD): design and methods. *BMC Public Health* 2011;**11**:485.

**Table A2: Raw education categories underlying re-coded maternal education data**

|               | Study               | Raw maternal education categories                                                                                                                                                                       | Re-coded categories  |
|---------------|---------------------|---------------------------------------------------------------------------------------------------------------------------------------------------------------------------------------------------------|----------------------|
| 1             | Denmark<br>EYHS     | <ul style="list-style-type: none"> <li>• Primary</li> <li>• Secondary</li> <li>• EFG basic</li> <li>• EFG 2</li> </ul>                                                                                  | Up to high school    |
|               |                     | <ul style="list-style-type: none"> <li>• Apprentice</li> <li>• Short further education</li> </ul>                                                                                                       | College / vocational |
|               |                     | <ul style="list-style-type: none"> <li>• Medium or long-term further education</li> </ul>                                                                                                               | University level     |
| 3             | Estonia<br>EYHS     | <ul style="list-style-type: none"> <li>• &lt; 8 years (basic education)</li> <li>• 9-11 years (secondary education)</li> </ul>                                                                          | Up to high school    |
|               |                     | <ul style="list-style-type: none"> <li>• 11-13 years (specialised secondary)</li> </ul>                                                                                                                 | College / vocational |
|               |                     | <ul style="list-style-type: none"> <li>• Higher not graduated</li> <li>• Higher education</li> </ul>                                                                                                    | University level     |
| 4             | Switzerland<br>KISS | <ul style="list-style-type: none"> <li>• Mandatory schooling only</li> <li>• Apprenticeship/informal education of under 2 years</li> </ul>                                                              | Up to high school    |
|               |                     | <ul style="list-style-type: none"> <li>• Formal apprenticeship of 2-4 years</li> </ul>                                                                                                                  | College / vocational |
|               |                     | <ul style="list-style-type: none"> <li>• University or equivalent</li> </ul>                                                                                                                            | University level     |
| 5             | Norway<br>EYHS      | <ul style="list-style-type: none"> <li>• Primary</li> <li>• Secondary</li> </ul>                                                                                                                        | Up to high school    |
|               |                     | <ul style="list-style-type: none"> <li>• University / Norwegian folk school</li> </ul>                                                                                                                  | University level     |
| 6             | ALSPAC              | <ul style="list-style-type: none"> <li>• No qualifications</li> <li>• O-levels, CSEs or GCSEs</li> <li>• A-levels</li> <li>• Qualifications in shorthand, typing or other skills</li> </ul>             | Up to high school    |
|               |                     | <ul style="list-style-type: none"> <li>• Apprenticeship</li> <li>• State enrolled nurse or state registered nurse</li> <li>• City &amp; Guilds intermediate or final technical qualification</li> </ul> | College / vocational |
|               |                     | <ul style="list-style-type: none"> <li>• Teaching qualification</li> <li>• University degree</li> </ul>                                                                                                 | University level     |
| 7             | PEACH               | <ul style="list-style-type: none"> <li>• GCSE</li> <li>• A-level</li> </ul>                                                                                                                             | Up to high school    |
|               |                     | <ul style="list-style-type: none"> <li>• First degree</li> <li>• Higher degree</li> </ul>                                                                                                               | University level     |
| 10<br>&<br>11 | CLAN and<br>HEAPS   | <ul style="list-style-type: none"> <li>• Never attended school</li> <li>• Primary school</li> <li>• Some high school or completed high school</li> </ul>                                                | Up to high school    |
|               |                     | <ul style="list-style-type: none"> <li>• Technical or trade school certificate</li> </ul>                                                                                                               | College / vocational |
|               |                     | <ul style="list-style-type: none"> <li>• University or tertiary qualification</li> </ul>                                                                                                                | University level     |
| 12            | Iowa Bone<br>Study  | <ul style="list-style-type: none"> <li>• Did not finished high school</li> <li>• High school diploma</li> </ul>                                                                                         | Up to high school    |
|               |                     | <ul style="list-style-type: none"> <li>• Some college</li> <li>• 2 years college degree</li> </ul>                                                                                                      | College / vocational |
|               |                     | <ul style="list-style-type: none"> <li>• 6-4 years college degree</li> <li>• Graduate or professional school</li> </ul>                                                                                 | University level     |
| 13            | Project<br>TAAG     | <ul style="list-style-type: none"> <li>• Did not finish high school</li> <li>• Finished high school</li> </ul>                                                                                          | Up to high school    |
|               |                     | <ul style="list-style-type: none"> <li>• Vocational training</li> <li>• Some college</li> </ul>                                                                                                         | College / vocational |
|               |                     | <ul style="list-style-type: none"> <li>• Graduated college or university</li> <li>• Professional training beyond 4 years</li> </ul>                                                                     | University level     |
| 14            | Madeira<br>EYHS     | <ul style="list-style-type: none"> <li>• No school</li> <li>• 1<sup>st</sup> grade through to 10<sup>th</sup> grade</li> </ul>                                                                          | Up to high school    |
|               |                     | <ul style="list-style-type: none"> <li>• 11 or 12<sup>th</sup> grade</li> </ul>                                                                                                                         | College / vocational |



**Figure A2: Association between maximum temperature during the measurement period of each study and the magnitude of the effect of evening daylight upon physical activity (N=15 studies)**

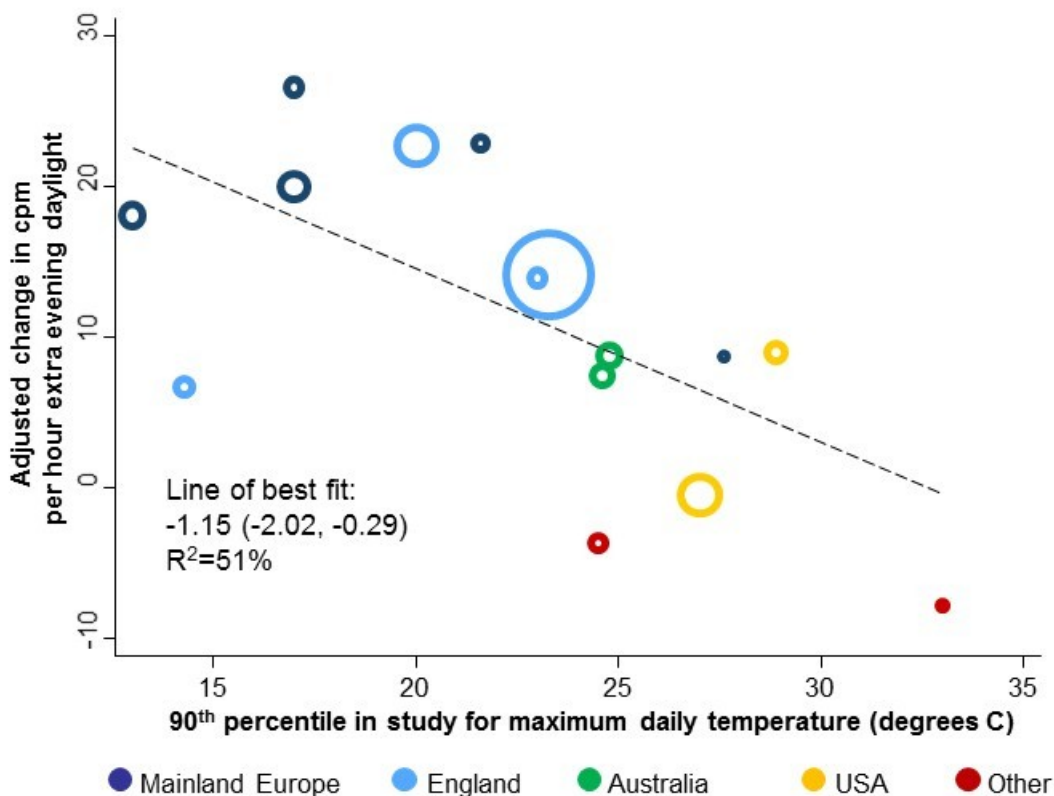

Larger circles represent more precise estimates from larger studies, with the size of the circles equal to the inverse of the within-study variance. The dashed line indicates the line of best fit from univariable random effects meta-regression.

In the above figure, we used meta-regression (Harbord & Higgins, 2008) to test the hypothesis that the magnitude of the association with evening daylight would be smaller in very hot settings, operationalising temperature as the 90th centile for daily maximum temperature during the observation period. This meta-regression analysis was post-hoc insofar as it was not pre-planned; it was, however, the only post-hoc meta-regression analysis we conducted.

**Reference:** Harbord H, Higgins JP. Meta-regression in Stata. *The Stata Journal* 2008;**8**:493–519.

Figure A3: Interaction between (a) sex and (b) age and hours of evening daylight, by study population†

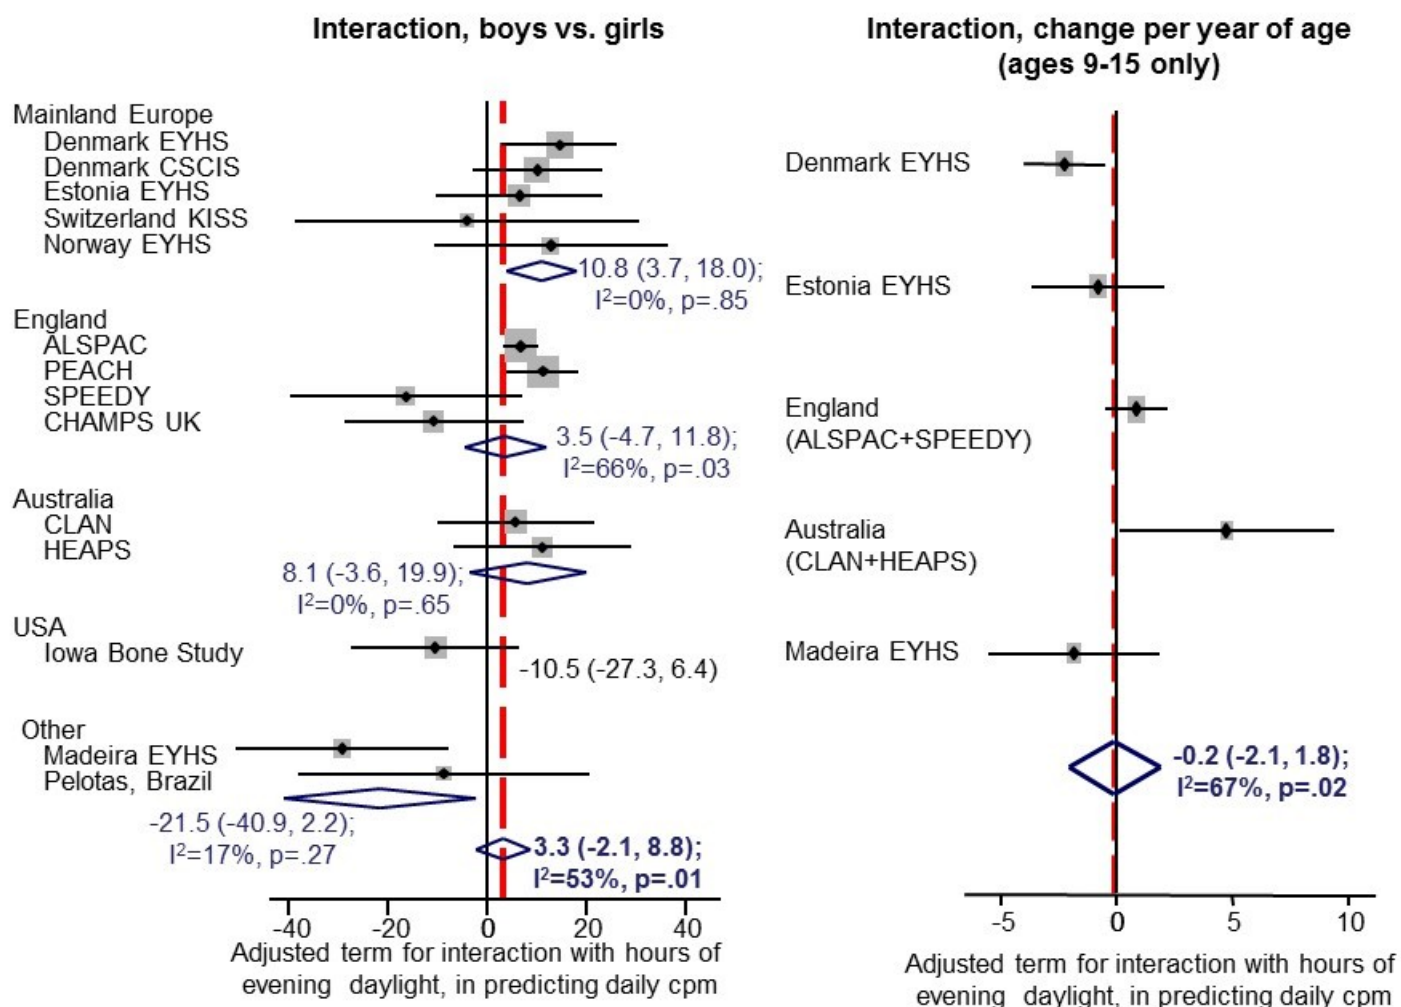

† For analyses by age, study populations from the same country were grouped in England and Australia to generate a sufficient sample size spanning the range 9-15; countries without a sample spanning this range are not presented. Random-effects pooled estimates are presented by country/region, with the red dotted line indicating the position of the overall pooled effect size. Effect sizes and 95% confidence intervals are shown following tests for interaction, with the adjusted interaction term representing the difference that the interaction variable (e.g. sex) makes to the effect size for evening daylight upon total daily activity measured in cpm.

**Figure A4: Interaction between (a) weight status and (b) maternal education and hours of evening daylight, by study population**

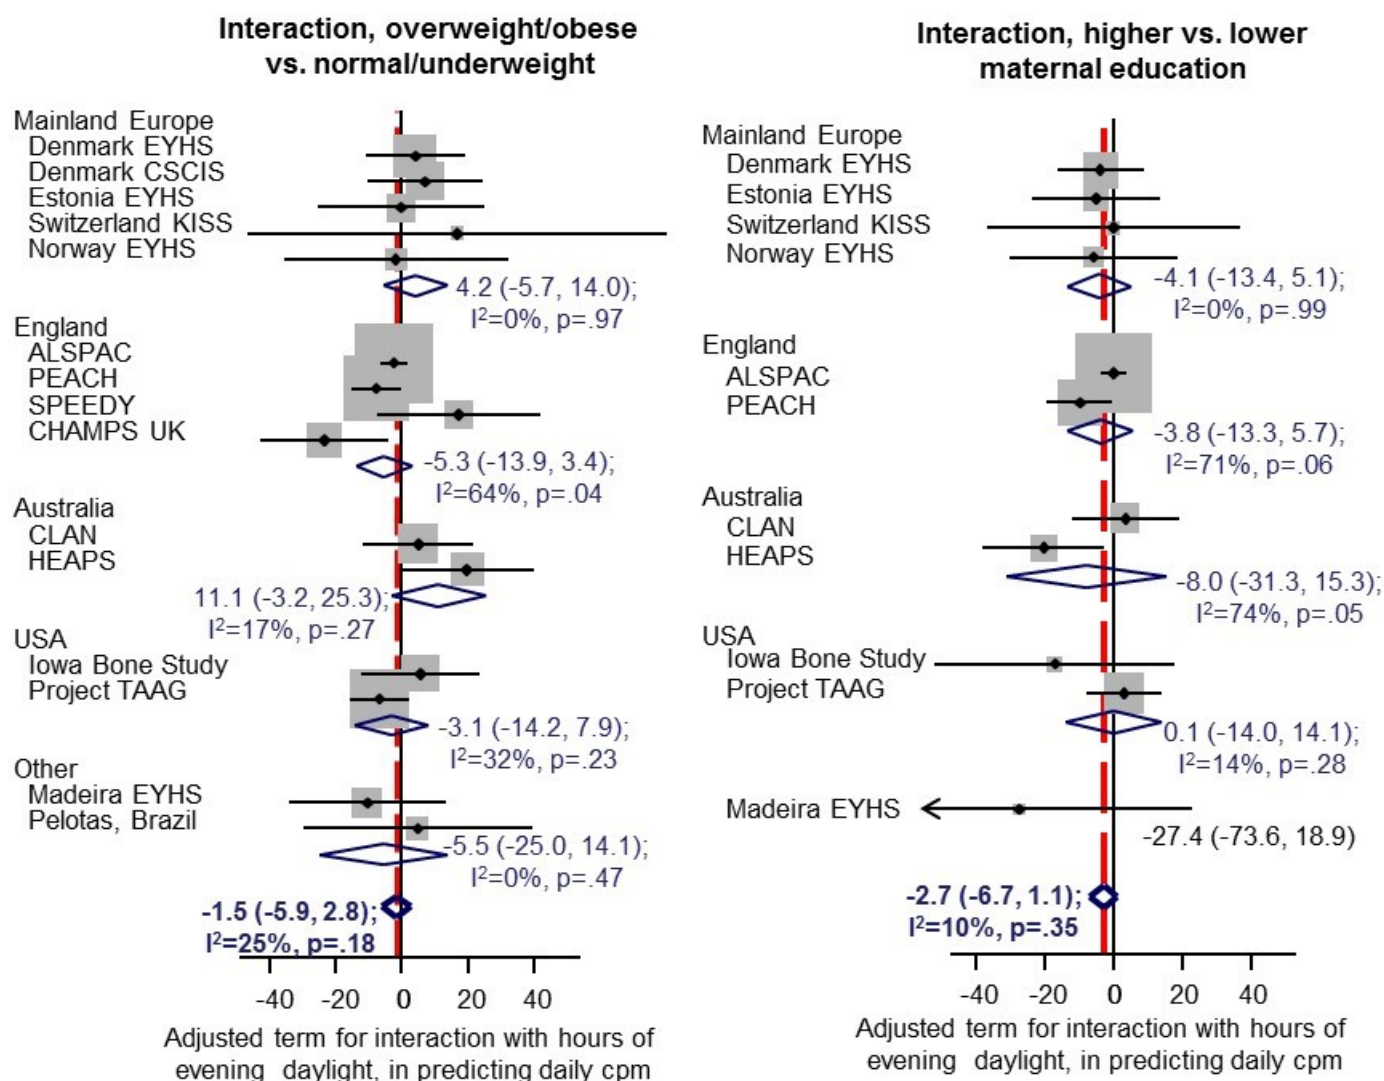

Random-effects pooled estimates presented by country/region, with the red dotted line indicating the position of the overall pooled effect size. Effect sizes and 95% confidence intervals are shown following tests for interaction, with the adjusted interaction term representing the difference that the interaction variable (e.g. overweight/obese weight status) makes to the effect size for evening daylight upon total daily activity measured in cpm.
